# Supplementary material
Source: Springer Nature journal article supplement (https://www.springermedizin.de/resource/supplementary/12959_2013_190_MOESM2_ESM.pdf/9569240)
Supplement: MOESM2 [file 9569240]

## **TOTAL ARTICLES IDENTIFIED**

New oral anticoagulants (1104)  
Dabigatran AND trial (349)  
Apixaban AND trial (174)  
Rivaroxaban AND trial (324)  
Edoxaban AND trial (54)

## **CLINICAL TRIALS IDENTIFIED**

86

**TOTAL NUMBER OF ARTICLES  
EXCLUDED (PHASE 1 TRIALS,  
PHASE 2 TRIALS, REVIEW  
ARTICLES, EDITORIALS)**

58

**TOTAL NUMBER OF STUDIES  
INCLUDED IN THE REVIEW  
(PHASE 3 CLINICAL TRIALS)**

Dabigatran (8)  
Apixaban (7)  
Rivaroxaban (13)
